# Supplementary material for: Genomic Characterization of Drug-Resistant Mycobacterium tuberculosis L2/Beijing Isolates from Astana, Kazakhstan
Source: Antibiotics (Basel). 2023 Oct 10;12(10):1523. doi: 10.3390/antibiotics12101523 (PMC10604462; doi:10.3390/antibiotics12101523)
Supplement: Supplementary file 1 [file antibiotics-12-01523-s001.zip › Tables S1-S5.xlsx]

## Sheet: Table S1
Meta data, phenotypic drug susceptibility testing results, compensatory mutations and classification for the studied clinical Mtb isolates
ID	Acc.No.	Dataset	Merker et al. 2015 (MTBC Beijing subgroup classification)	Thawornwattana et al., 2021 (SNP barcode for Mtb lineage 2)	DR type	INH_pheno	katG	fabG1	inhA	ndh	mshA	RIF_pheno	rpoB_complete	rpoB_RRDR	STM_pheno	rpsL	gid	whiB7	EMB_pheno	embB	embC	embA	PZA_pheno	pncA	rpsA	OFX_pheno	gyrB	gyrA	KAN_pheno	rrs	eis	whiB7	AMK_pheno	rrs	CAP_pheno	rrs	tlyA	ETO_pheno	ethA	ethR	fabG1	inhA	ndh	mshA	BDQ_pheno	CFZ_pheno	Rv0678	rpoB_compensatory	rpoC_compensatory
1028	SRR24828614	Astana, Kazakhstan (current study)	Central Asia outbreak	L2.2.M4.9.1	Pre-XDR	R	S315T, R463L	wt	wt	wt	wt	R	S450L	S450L	R	K43R	E92D	wt	R	M306V	wt	-590C>T, 228C>T, T314I	S	wt	636A>C	R	wt	A90V, E21Q, G668D, S95T	S	-187C>T	wt	wt	S	wt	S	wt	33A>G	S	T314I	wt	wt	wt	wt	A187V	S	S	wt
1561	SRR24828613	Astana, Kazakhstan (current study)	Europe/Russian W148 Outbreak	L2.2.M4.5	Pre-XDR	R	S315T, R463L	wt	wt	wt	wt	R	S450L	S450L	R	K43R	E92D, 615A>G	wt	R	Y319S	wt	-16C>T, -590C>T, 114A>G, 228C>T	R	D63A	636A>C	R	T500P	E21Q, S95T, G668D	S	-187C>T	wt	wt	S	-187C>T	S	-187C>T	33A>G	S	wt	wt	wt	wt	wt	A187V	R	R	193delG		D485N
3775	SRR24828602	Astana, Kazakhstan (current study)	Central Asia outbreak	L2.2.M4.9.1	Pre-XDR	R	S315T	wt	wt	wt	wt	R	S450L	S450L	R	K43R, -165T>C	E92D, 615A>G	-161A>G	R	M306V	wt	-590C>T, 228C>T, L459P	S	wt	636A>C	R	wt	D94N, E21Q, S95T	S	-187C>T, 1250G>T	wt	-161A>G	S	-187C>T, 1250G>T	S	-187C>T, 1250G>T	33A>G	S	T314I	wt	wt	wt	wt	A187V	S	S	wt		G519S K717Q
4800	SRR24828597	Astana, Kazakhstan (current study)	Central Asia outbreak	L2.2.M4.9.1	Pre-XDR	R	S315T, R463L	wt	wt	wt	wt	R	S450L	S450L	R	K43R, -165T>C	E92D, 615A>G	wt	R	M306V	wt	-590C>T, 228C>T	R	I133T	636A>C	R	wt	S91P, E21Q, S95T, G668D	R	-187C>T, 1401A>G	wt	wt	R	-187C>T, 1401A>G	R	-187C>T, 1401A>G	33A>G	S	T342A	wt	wt	wt	wt	A187V	S	S	wt		V483G
5023	SRR24828596	Astana, Kazakhstan (current study)	Central Asia	L2.2.M4.9	Sens	S	R463L	wt	wt	wt	A187V	S	wt	wt	S	-165T>C	E92D, 615A>G	wt	S	wt	wt	-590C>T, 228C>T, L726H	S	wt	636A>C	S	wt	E21Q, S95T, G668D	S	-187C>T, 116C>G, 154G>A, 638C>T, 1126G>A	wt	wt	S	-187C>T, 116C>G, 154G>A, 638C>T, 1126G>A	S	-187C>T, 116C>G, 154G>A, 638C>T, 1126G>A	33A>G	S	wt	wt	wt	wt	wt	A187V	S	S	wt
5099	SRR24828595	Astana, Kazakhstan (current study)	Central Asia outbreak	L2.2.M4.9.1	Pre-XDR	R	S315T, R463L	wt	wt	wt	wt	R	S450L	S450L	R	K43R, -165T>C	E92D, 615A>G	-116A>G	R	M306V	wt	-590C>T, 228C>T	S	wt	636A>C	R	wt	D94G, E21Q, S95T, G668D	S	-187C>T	wt	-116A>G	S	-187C>T	S	-187C>T	33A>G	S	T314I	wt	wt	wt	wt	A187V	S	S	wt		V1039A
5135	SRR24828594	Astana, Kazakhstan (current study)	Central Asia outbreak	L2.2.M4.9.1	Pre-XDR	R	S315T, R463L	wt	wt	wt	wt	R	S450L T585S	S450L	R	K43R, -165T>C	E92D, 615A>G	wt	R	G406D	wt	-590C>T, 228C>T	S	H71L	636A>C	R	wt	D94A, E21Q, S95T, G668D	S	-187C>T	wt	wt	S	-187C>T	S	-187C>T	33A>G	S	wt	wt	wt	wt	wt	A187V	S	S	wt	T585S
5194	SRR24828593	Astana, Kazakhstan (current study)	Central Asia outbreak	L2.2.M4.9.1	MDR	R	S315T, R463L	wt	wt	wt	wt	R	S450L	S450L	R	K43R, -165T>C	E92D, 615A>G	wt	R	M306V	wt	-590C>T, 228C>T	R	287delA	636A>C	S	wt	E21Q, S95T, G668D	S	-187C>T, 791G>A, 1178G>A	wt	wt	S	-187C>T, 791G>A, 1178G>A	S	-187C>T, 791G>A, 1178G>A	33A>G	S	T314I	wt	wt	wt	wt	A187V	S	S	wt
5195	SRR24828592	Astana, Kazakhstan (current study)	Central Asia outbreak	L2.2.M4.9.1	Pre-XDR	R	S315T, R463L	wt	wt	wt	wt	R	S450L	S450L	R	K43R, -165T>C	E92D, 615A>G	-116A>G	R	M306V	wt	-590C>T, 228C>T	R	L85R	636A>C	R	D461H	E21Q, S95T, G158C, G668D	S	-187C>T	wt	-116A>G	S	-187C>T	S	-187C>T	33A>G	S	T314I	wt	wt	wt	wt	A187V	S	S	wt		V1039A
5219	SRR24828591	Astana, Kazakhstan (current study)	Central Asia outbreak	L2.2.M4.9.1	Pre-XDR	R	S315T, R463L	wt	wt	wt	wt	R	S450L	S450L	R	K43R, -165T>C	E92D, 615A>G	-116A>G	R	M306V	wt	-590C>T, 228C>T	S	wt	636A>C	R	wt	D94G, E21Q, S95T, G668D	S	-187C>T, -13G>A, 1314C>T	wt	-116A>G	S	-187C>T, -13G>A, 1314C>T	S	-187C>T, -13G>A, 1314C>T	33A>G	S	T314I	wt	wt	wt	wt	A187V	S	S	wt		V1039A
5264	SRR24828612	Astana, Kazakhstan (current study)	Europe/Russian W148 Outbreak	L2.2.M4.5	Pre-XDR	R	S315T, R463L	wt	wt	wt	wt	R	S450L	S450L	R	K43R, -165T>C	E92D, 615A>G	wt	R	Y319S	wt	-16C>T, -590C>T, 114A>G, 228C>T	R	D63A	636A>C	R	T500P, A564V	E21Q, S95T, G668D	S	-187C>T	wt	wt	S	-187C>T	S	-187C>T	33A>G	S	wt	wt	wt	wt	wt	A187V	R	S	193delG		D485N
5313	SRR24828611	Astana, Kazakhstan (current study)	Central Asia outbreak	L2.2.M4.9.1	MDR	R	S315T, R463L	wt	wt	wt	wt	R	S450L	S450L	R	K43R, -165T>C	E92D, 615A>G	wt	R	M306V	wt	-590C>T, 228C>T	S	wt	636A>C	S	wt	E21Q, S95T, G668D	S	-187C>T	wt	wt	S	-187C>T	S	-187C>T	33A>G	S	T314I	wt	wt	wt	wt	A187V	S	S	wt
5382	SRR24828610	Astana, Kazakhstan (current study)	Central Asia	L2.2.M4.9	MDR	R	S315T, R463L	-8T>A	wt	wt	wt	R	S450L	S450L	R	K43R, -165T>C	E92D, 615A>G	wt	R	M306V	wt	-590C>T, 228C>T	R	W68R	636A>C	S	wt	E21Q, S95T, G668D	R	1401 A/G	wt	wt	R	1401 A/G	R	1401 A/G	33A>G	S	wt	wt	-8T>A	wt	wt	A187V	S	S	wt
5628	SRR24828609	Astana, Kazakhstan (current study)	Europe/Russian W148 Outbreak	L2.2.M4.5	Pre-XDR	R	S315T, R463L	wt	wt	wt	wt	R	S450L	S450L	R	K43R	E92D, 615A>G	wt	R	M306V	wt	-590C>T, 114A>G, 228C>T	R	V139A	wt	R	A504T	A90V, E21Q, G668D, S95T	R	-187C>T, 254G>A, 394C>T, 410delA, 1095G>A, 1296G>A	-37G>T	wt	S	-187C>T, 254G>A, 394C>T, 410delA, 1095G>A, 1296G>A	S	-187C>T, 254G>A, 394C>T, 410delA, 1095G>A, 1296G>A	33A>G	S	V202G	wt	wt	wt	wt	A187V	S	S	wt		V517L
6242	SRR24828608	Astana, Kazakhstan (current study)	Central Asia	L2.2.M4.9	Other (S)	S	R463L	wt	wt	wt	A187V	S	wt	wt	R	K43R	E92D, 615A>G	wt	S	wt	wt	-590C>T, 228C>T	S	wt	636A>C	S	wt	E21Q, S95T, G668D	S	-187C>T, 161G>T, 643T>A	wt	wt	S	-187C>T, 161G>T, 643T>A	S	-187C>T, 161G>T, 643T>A	33A>G	S	wt	wt	wt	wt	wt	A187V	R	S	wt
6466	SRR24828607	Astana, Kazakhstan (current study)	Central Asia	L2.2.M4.9	MDR	R	S315T, R463L	wt	S94A	wt	wt	R	H445Y	H445Y	R	K43R	E92D, 615A>G, -60A>G	wt	R	wt	wt	-16C>T, -590C>T, 228C>T	S	wt	636A>C	S	wt	E21Q, S95T, G668D	S	-187C>T	wt	wt	S	-187C>T	S	-187C>T	33A>G	R	wt	wt	wt	S94A	wt	A187V	R	S	wt
6616	SRR24828606	Astana, Kazakhstan (current study)	Central Asia outbreak	L2.2.M4.9.1	Pre-XDR	R	S315T, R463L	wt	wt	wt	wt	R	S450L	S450L	R	K43R, -165T>C	E92D, 615A>G	-161A>G	R	M306V	wt	-590C>T, 228C>T, L459P	S	wt	636A>C	R	V261M, E516K, K619E, V636M	D94N, E21Q, S95T, P275R, G668D	S	-187C>T, -13G>A	wt	-161A>G	S	-187C>T, -13G>A	S	-187C>T, -13G>A	A262V, P253A	S	T314I	-456G>A	wt	wt	wt	A187V	S	S	wt		G519S K717Q
6646	SRR24828605	Astana, Kazakhstan (current study)	Central Asia outbreak	L2.2.M4.9.1	Pre-XDR	R	S315T, R463L	wt	wt	wt	wt	R	S450L	S450L	R	K43R, -165T>C	E92D, 615A>G	-161A>G	R	M306V	wt	-590C>T, 228C>T, V997M	S	wt	636A>C	R	wt	D94G, E21Q, S95T, G668D	S	-187C>T	wt	-116A>G	S	-187C>T	R	-187C>T	33A>G, 395dupA	S	T314I	wt	wt	wt	wt	A187V	S	S	wt		V1039A
7076	SRR24828604	Astana, Kazakhstan (current study)	Central Asia	L2.2.M4.9	Sens	S	R463L	wt	wt	wt	A187V	S	wt	wt	S	-165T>C	E92D, 615A>G	wt	S	G908E	wt	-590C>T, 228C>T	S	wt	636A>C	S	wt	E21Q, S95T, G668D	S	-187C>T	wt	wt	S	-187C>T	S	-187C>T	33A>G	S	wt	wt	wt	wt	wt	A187V	S	S	wt
7357	SRR24828603	Astana, Kazakhstan (current study)	Central Asia outbreak	L2.2.M4.9.1	MDR	R	S315T, R463L	wt	wt	wt	wt	R	S450L Y564H	S450L	R	K43R, -165T>C	E92D, 615A>G	wt	R	M306V	wt	-590C>T, 228C>T	R	W68R	636A>C	S	I556W, 1635delG	E21Q, S95T, G668D	S	-187C>T	wt	wt	S	187C>T	S	-187C>T	33A>G	S	T314I	wt	wt	wt	wt	A187V	S	S	wt	Y564H
7389	SRR24828601	Astana, Kazakhstan (current study)	Central Asia outbreak	L2.2.M4.9.1	Pre-XDR	R	S315T, R463L	wt	wt	wt	wt	R	S450L	S450L	R	K43R, -165T>C	E92D, 615A>G	wt	R	M306V	wt	-590C>T, 228C>T	R	V139A	636A>C	R	wt	A90V, E21Q, S95T, G668D	S	187C>T	wt	wt	S	187C>T	S	-187C>T	33A>G	S	T314I	wt	wt	wt	A	A187V	R	S	G66E
7678	SRR24828600	Astana, Kazakhstan (current study)	Central Asia outbreak	L2.2.M4.9.1	Pre-XDR	R	S315T, R463L	wt	wt	wt	wt	R	H445Y	H445Y	R	K43R, -165T>C	E92D, 615A>G	wt	R	G406D	wt	-590C>T, 228C>T	S	wt	636A>C	R	wt	A90V, E21Q, S95T, G668D	S	-187C>T	wt	wt	S	-187C>T	S	-187C>T	33A>G	S	G406D	wt	wt	wt	wt	A187V	S	S	wt
7923	SRR24828599	Astana, Kazakhstan (current study)	Central Asia outbreak	L2.2.M4.9.1	XDR	R	S315T, R463L	wt	wt	wt	wt	R	S450L	S450L	R	K43R, -165T>C	E92D, 615A>G	wt	R	M306V	wt	-11C>A, -590C>T, 228C>T	S	wt	636A>C	R	wt	D94G, E21Q, S95T, G668D	S	-187C>T	wt	wt	S	-187C>T	S	-187C>T	33A>G, F157L	S	wt	wt	wt	wt	wt	A187V	R	S	S68G		V431M
8316	SRR24828598	Astana, Kazakhstan (current study)	Clade A	L2.2.M4.9.2	Pre-XDR	R	S315T, R463L	wt	wt	wt	wt	R	S450L E761D	S450L	S	-165T>C	E92D, 615A>G	wt	R	D354A	wt	-590C>T, 228C>T	S	I6L, -627G>T	636A>C	R	D657Y	D94G, -236G>T, E21Q, S95T, G668D	R	-187C>T	-37G>T	wt	S	-187C>T	S	-187C>T	33A>G	R	-7T>C	wt	wt	wt	wt	A187V	S	S	wt	E761D
10293-95	ERS457970	Germany (Merker et al., 2018)	Central Asia outbreak	L2.2.M4.9.1	MDR	R	S315T	wt	wt	wt	wt	R	L430P H445R	L430P H445R	R	K43R	wt	wt	S	wt	wt	-41 delA	S	wt	wt	S	wt	S698S	S	wt	wt	wt	S	wt	S	wt	wt	S	wt	wt	wt	wt	wt	wt	S	S	wt
2402-06	ERS457581	Nukus, Uzbekistan (Merker et al., 2018)	Central Asia	L2.2.M4.9	MDR	R	S315T	wt	wt	wt	wt	R	S450L	S450L	R	K43R	wt	wt	R	D328Y	wt	-16 C/T	R	2288848_2288856 GAP	wt	S	wt	wt	S	wt	wt	wt	S	wt	S	wt	wt	S	wt	wt	wt	wt	wt	wt	S	S	wt		G519S
687-05	ERS457675	Nukus, Uzbekistan (Merker et al., 2018)	Central Asia outbreak	L2.2.M4.9.1	MDR	R	S315T	wt	wt	wt	wt	R	S450L	S450L	R	K43R	wt	wt	R	G406A	wt	wt	R	promotor deletion	wt	S	wt	wt	S	wt	wt	wt	S	wt	S	wt	wt	S	wt	wt	wt	wt	wt	wt	S	S	wt		V483G
688-06	ERS458407	Nukus, Uzbekistan (Merker et al., 2018)	Central Asia outbreak	L2.2.M4.9.1	MDR	R	S315T	wt	wt	wt	wt	R	S450L	S450L	R	K43R	wt	wt	R	M306V	wt	wt	R	I133T	wt	S	wt	wt	R	wt	-12 c>t	wt	S	wt	S	wt	wt	R	T314I	wt	wt	wt	wt	wt	S	S	wt		N698S
698-05	ERS457711	Nukus, Uzbekistan (Merker et al., 2018)	Europe/Russian W148 Outbreak	L2.2.M4.5	MDR	R	S315T	wt	wt	wt	wt	R	Q432P	Q432P	R	K43R	wt	wt	R	M306V	wt	wt	S	wt	wt	S	wt	wt	S	wt	wt	wt	S	wt	S	wt	L160W (ttg/tGg)	S	M260I (atg/atC)	wt	wt	wt	wt	wt	S	S	wt		V483G
8262-01	ERS457296	Nukus, Uzbekistan (Merker et al., 2018)	Central Asia outbreak	L2.2.M4.9.1	MDR	R	S315T	wt	wt	wt	wt	R	S450L	S450L	R	K43R	wt	wt	R	M306I	wt	wt	S	wt	wt	S	wt	wt	S	wt	wt	wt	S	wt	S	wt	wt	S	wt	wt	wt	wt	wt	wt	S	S	wt
9053-05	ERS456791	Nukus, Uzbekistan (Merker et al., 2018)	Central Asia outbreak	L2.2.M4.9.1	Pre-XDR	R	S315T	wt	wt	wt	wt	R	S450L I488V	S450L	R	K43R	wt	wt	R	L74R D328G	wt	wt	R	K48E	wt	S	wt	wt	R	1401 A/G	wt	wt	R	1401 A/G	R	1401 A/G	wt	R	4327364 GAP	wt	wt	wt	wt	wt	S	S	wt	I488V
[truncated: 3 more columns]

## Sheet: Table S2
Pairwise SNP distance matrix of 47 MTBC genomic DNA sequences
	1028	10293-95	1561	2402-06	3775	4800	5023	5099	5135	5194	5195	5219	5264	5313	5382	5628	6242	6466	6616	6646	687-05	688-06	698-05	7076	7357	7389	7678	7923	8262-01	8316	9053-05	N0004	N0031	N0052	N0054	N0069	N0136	N0155	N0157	N1176	N1201	N1202	N1268	N1272	N1274	N1283	N3913
1028	0	26	170	118	29	29	109	26	34	22	33	25	169	21	120	170	115	119	30	26	22	23	162	117	26	28	34	28	29	130	27	954	717	494	959	1541	974	191	1531	1607	1683	1683	1604	1584	942	964	1551
10293-95	26	0	160	108	23	21	99	20	26	16	27	19	159	19	110	160	105	109	24	20	14	17	152	107	20	22	26	20	15	120	19	944	707	484	949	1531	964	181	1521	1597	1673	1673	1594	1574	932	954	1541
1561	170	160	0	160	167	165	153	164	170	160	171	163	1	163	164	52	159	161	168	164	158	161	44	165	164	166	170	164	165	172	163	954	715	494	959	1537	974	191	1531	1607	1681	1681	1604	1584	940	964	1549
2402-06	118	108	160	0	113	113	101	112	118	108	119	111	159	111	34	162	107	109	114	112	106	109	154	113	112	114	118	112	113	122	111	946	709	486	951	1533	966	183	1525	1599	1675	1675	1596	1576	934	956	1543
3775	29	23	167	113	0	26	106	23	31	19	30	22	166	22	117	167	112	116	3	23	19	20	159	114	15	25	31	25	28	127	24	951	714	491	956	1538	971	188	1528	1604	1680	1680	1601	1581	939	961	1548
4800	29	21	165	113	26	0	104	23	29	19	30	22	164	22	115	165	110	114	27	23	15	20	155	112	23	25	29	23	26	125	22	949	712	489	954	1536	969	186	1526	1602	1678	1678	1599	1579	937	959	1546
5023	109	99	153	101	106	104	0	103	109	99	110	102	152	102	103	153	98	88	107	103	97	100	145	104	103	105	109	103	104	113	102	935	698	477	940	1522	953	174	1514	1588	1664	1664	1585	1565	923	945	1532
5099	26	20	164	112	23	23	103	0	28	14	21	1	163	19	114	164	109	113	24	14	16	17	156	111	20	20	28	22	25	124	21	948	711	488	953	1535	968	185	1525	1601	1677	1677	1598	1578	936	958	1545
5135	34	26	170	118	31	29	109	28	0	24	35	27	169	27	120	170	115	119	32	28	22	25	162	117	28	30	18	28	31	130	27	954	717	494	959	1541	972	191	1531	1607	1683	1683	1604	1584	942	964	1551
5194	22	16	160	108	19	19	99	14	24	0	21	13	159	15	110	160	105	109	20	14	12	13	152	107	16	16	24	18	21	120	17	944	707	484	949	1531	964	181	1521	1597	1673	1673	1594	1574	932	954	1541
5195	33	27	171	119	30	30	110	21	35	21	0	20	170	26	121	171	116	120	31	21	23	24	163	118	27	27	35	29	32	131	28	955	718	495	960	1542	975	192	1532	1608	1684	1684	1605	1585	943	965	1552
5219	25	19	163	111	22	22	102	1	27	13	20	0	162	18	113	163	108	112	23	13	15	16	155	110	19	19	27	21	24	123	20	947	710	487	952	1534	967	184	1524	1600	1676	1676	1597	1577	935	957	1544
5264	169	159	1	159	166	164	152	163	169	159	170	162	0	162	163	51	158	160	167	163	157	160	43	164	163	165	169	163	164	171	162	953	714	493	958	1536	973	190	1530	1606	1680	1680	1603	1583	939	963	1548
5313	21	19	163	111	22	22	102	19	27	15	26	18	162	0	113	163	108	112	23	19	15	16	155	110	19	21	27	21	22	123	20	947	710	487	952	1534	967	184	1524	1600	1676	1676	1597	1577	935	957	1544
5382	120	110	164	34	117	115	103	114	120	110	121	113	163	113	0	164	109	113	118	114	108	111	156	115	114	116	120	114	115	124	113	948	711	488	953	1533	968	185	1525	1601	1677	1677	1598	1578	936	958	1545
5628	170	160	52	162	167	165	153	164	170	160	171	163	51	163	164	0	159	163	168	164	158	161	44	165	164	166	170	164	165	172	163	954	717	494	959	1539	974	191	1533	1607	1683	1683	1604	1584	942	964	1549
6242	115	105	159	107	112	110	98	109	115	105	116	108	158	108	109	159	0	108	113	109	103	106	151	110	109	111	115	109	110	119	108	943	706	483	948	1530	963	180	1522	1596	1672	1672	1593	1573	931	951	1540
6466	119	109	161	109	116	114	88	113	119	109	120	112	160	112	113	163	108	0	117	113	107	110	155	114	113	115	119	113	114	123	112	947	710	487	952	1534	967	184	1526	1600	1676	1676	1597	1577	935	957	1544
6616	30	24	168	114	3	27	107	24	32	20	31	23	167	23	118	168	113	117	0	24	20	21	160	115	16	26	32	26	29	128	25	952	715	492	957	1539	972	189	1529	1605	1681	1681	1602	1582	940	962	1549
6646	26	20	164	112	23	23	103	14	28	14	21	13	163	19	114	164	109	113	24	0	16	17	156	111	20	20	28	22	25	124	21	948	711	488	953	1535	968	185	1525	1601	1677	1677	1598	1578	936	958	1545
687-05	22	14	158	106	19	15	97	16	22	12	23	15	157	15	108	158	103	107	20	16	0	13	148	105	16	18	22	16	19	118	15	942	705	482	947	1529	962	179	1519	1595	1671	1671	1592	1572	930	952	1539
688-06	23	17	161	109	20	20	100	17	25	13	24	16	160	16	111	161	106	110	21	17	13	0	153	108	17	19	25	19	22	121	18	945	708	485	950	1532	965	182	1522	1598	1674	1674	1595	1575	933	955	1542
698-05	162	152	44	154	159	155	145	156	162	152	163	155	43	155	156	44	151	155	160	156	148	153	0	157	156	158	162	156	157	166	155	946	709	486	951	1531	966	183	1525	1599	1675	1675	1596	1576	934	956	1541
7076	117	107	165	113	114	112	104	111	117	107	118	110	164	110	115	165	110	114	115	111	105	108	157	0	111	113	117	111	112	125	110	949	712	489	954	1536	969	186	1526	1602	1678	1678	1599	1579	937	959	1546
7357		20	164	112	15	23	103	20	28	16	27	19	163	19	114	164	109	113	16	20	16	17	156	111	0	22	28	22	25	124	21	948	711	488	953	1535	968	185	1525	1601	1677	1677	1598	1578	936	958	1545
7389	28	22	166	114	25	25	105	20	30	16	27	19	165	21	116	166	111	115	26	20	18	19	158	113	22	0	30	24	27	126	23	950	713	490	955	1537	970	187	1527	1603	1679	1679	1600	1580	938	960	1547
7678	34	26	170	118	31	29	109	28	18	24	35	27	169	27	120	170	115	119	32	28	22	25	162	117	28	30	0	28	31	130	27	954	717	494	959	1541	972	191	1531	1607	1683	1683	1604	1584	942	964	1551
7923	28	20	164	112	25	23	103	22	28	18	29	21	163	21	114	164	109	113	26	22	16	19	156	111	22	24	28	0	25	124	21	948	711	488	953	1535	968	185	1525	1601	1677	1677	1598	1578	936	958	1545
8262-01	29	15	165	113	28	26	104	25	31	21	32	24	164	22	115	165	110	114	29	25	19	22	157	112	25	27	31	25	0	125	24	949	712	489	954	1536	969	186	1526	1602	1678	1678	1599	1579	937	959	1546
8316	130	120	172	122	127	125	113	124	130	120	131	123	171	123	124	172	119	123	128	124	118	121	166	125	124	126	130	124	125	0	123	958	719	498	963	1543	978	195	1535	1611	1685	1685	1608	1588	944	968	1555
9053-05	27	19	163	111	24	22	102	21	27	17	28	20	162	20	113	163	108	112	25	21	15	18	155	110	21	23	27	21	24	123	0	947	710	487	952	1534	967	184	1524	1600	1676	1676	1597	1577	935	957	1544
N0004	954	944	954	946	951	949	935	948	954	944	955	947	953	947	948	954	943	947	952	948	942	945	946	949	948	950	954	948	949	958	947	0	924	922	303	1537	966	947	1529	1602	1681	1681	1599	1579	474	958	1547
N0031	717	707	715	709	714	712	698	711	717	707	718	710	714	710	711	717	706	710	715	711	705	708	709	712	711	713	717	711	712	719	710	924	0	684	929	1507	942	710	1497	1576	1652	1652	1573	1553	908	933	1521
N0052	494	484	494	486	491	489	477	488	494	484	495	487	493	487	488	494	483	487	492	488	482	485	486	489	488	490	494	488	489	498	487	922	684	0	927	1506	942	487	1499	1573	1651	1651	1570	1550	908	930	1519
N0054	959	949	959	951	956	954	940	953	959	949	960	952	958	952	953	959	948	952	957	953	947	950	951	954	953	955	959	953	954	963	952	303	929	927	0	1542	971	952	1534	1607	1686	1686	1604	1584	475	961	1552
N0069	1541	1531	1537	1533	1538	1536	1522	1535	1541	1531	1542	1534	1536	1534	1533	1539	1530	1534	1539	1535	1529	1532	1531	1536	1535	1537	1541	1535	1536	1543	1534	1537	1507	1506	1542	0	1467	1534	762	1618	1692	1692	1615	1593	1521	1461	1674
N0136	974	964	974	966	971	969	953	968	972	964	975	967	973	967	968	974	963	967	972	968	962	965	966	969	968	970	972	968	969	978	967	966	942	942	971	1467	0	967	1459	1537	1609	1609	1534	1512	954	626	1481
N0155	191	181	191	183	188	186	174	185	191	181	192	184	190	184	185	191	180	184	189	185	179	182	183	186	185	187	191	185	186	195	184	947	710	487	952	1534	967	0	1526	1600	1676	1676	1597	1577	935	957	1544
N0157	1531	1521	1531	1525	1528	1526	1514	1525	1531	1521	1532	1524	1530	1524	1525	1533	1522	1526	1529	1525	1519	1522	1525	1526	1525	1527	1531	1525	1526	1535	1524	1529	1497	1499	1534	762	1459	1526	0	1612	1686	1686	1609	1587	1511	1455	1666
N1176	1607	1597	1607	1599	1604	1602	1588	1601	1607	1597	1608	1600	1606	1600	1601	1607	1596	1600	1605	1601	1595	1598	1599	1602	1601	1603	1607	1601	1602	1611	1600	1602	1576	1573	1607	1618	1537	1600	1612	0	1644	1644	371	363	1588	1525	1743
N1201	1683	1673	1681	1675	1680	1678	1664	1677	1683	1673	1684	1676	1680	1676	1677	1683	1672	1676	1681	1677	1671	1674	1675	1678	1677	1679	1683	1677	1678	1685	1676	1681	1652	1651	1686	1692	1609	1676	1686	1644	0	1644	1641	1621	1663	1603	1824
N1202	1683	1673	1681	1675	1680	1678	1664	1677	1683	1673	1684	1676	1680	1676	1677	1683	1672	1676	1681	1677	1671	1674	1675	1678	1677	1679	1683	1677	1678	1685	1676	1681	1652	1651	1686	1692	1609	1676	1686	1644	1644	0	1641	1621	1663	1603	1824
N1268	1604	1594	1604	1596	1601	1599	1585	1598	1604	1594	1605	1597	1603	1597	1598	1604	1593	1597	1602	1598	1592	1595	1596	1599	1598	1600	1604	1598	1599	1608	1597	1599	1573	1570	1604	1615	1534	1597	1609	371	1641	1641	0	360	1585	1522	1740
N1272	1584	1574	1584	1576	1581	1579	1565	1578	1584	1574	1585	1577	1583	1577	1578	1584	1573	1577	1582	1578	1572	1575	1576	1579	1578	1580	1584	1578	1579	1588	1577	1579	1553	1550	1584	1593	1512	1577	1587	363	1621	1621	360	0	1565	1502	1720
N1274	942	932	940	934	939	937	923	936	942	932	943	935	939	935	936	942	931	935	940	936	930	933	934	937	936	938	942	936	937	944	935	474	908	908	475	1521	954	935	1511	1588	1663	1663	1585	1565	0	944	1537
N1283	964	954	964	956	961	959	945	958	964	954	965	957	963	957	958	964	951	957	962	958	952	955	956	959	958	960	964	958	959	968	957	958	933	930	961	1461	626	957	1455	1525	1603	1603	1522	1502	944	0	1473
N3913	1551	1541	1549	1543	1548	1546	1532	1545	1551	1541	1552	1544	1548	1544	1545	1549	1540	1544	1549	1545	1539	1542	1541	1546	1545	1547	1551	1545	1546	1555	1544	1547	1521	1519	1552	1674	1481	1544	1666	1743	1824	1824	1740	1720	1537	1473	0
Pairs with 0–12 SNPs (red), 13–50 SNPs (yellow)

## Sheet: Table S3
Critical concentrations of anti-tuberculosis drugs used for drug susceptibility testing
Drug	Method	Critical concentration (µg/ml)
Isoniazid	Liquid (MGIT 960 system)	0.1
Rifampicin	Liquid (MGIT 960 system)	1
Ethambutol	Liquid (MGIT 960 system)	5
Pyrazinamide	Liquid (MGIT 960 system)	100
Streptomycin	Liquid (MGIT 960 system)	1
Amikacin	Liquid (MGIT 960 system)	1
Levofloxacin	Liquid (MGIT 960 system)	1
Moxifloxacin	Liquid (MGIT 960 system)	0.25/1.0
Protionamide	Liquid (MGIT 960 system)	2.5
Linezolid	Liquid (MGIT 960 system)	1
Bedaquiline	Liquid (MGIT 960 system)	1
Delaminid	Liquid (MGIT 960 system)	0.06
Clofazimine	Liquid (MGIT 960 system)	0.5

## Sheet: Table S4
Daily doses (mg) of anti-tuberculosis drugs for the treatment of drug-susceptible tuberculosis in Kazakhstan
Drug	Weight (kg)
	30-39	40-54	55-70	more than 70
Intensive phase - daily intake
Isoniazid	200 mg	300 mg	300 mg	400 mg
Rifampicin	300 mg	450 mg	600 mg	750 mg
Pyrazinamide	1000 mg	1500 mg	2000 mg	2000 mg
Ethambutol	600 mg	800 mg	1200 mg	1600 mg
Supportive phase - daily intake
Isoniazid	200 mg	300 mg	300 mg	400 mg
Rifampicin	300 mg	450 mg	600 mg	750 mg
Maximal daily dose of rifampicin in combined anti-tubercular drugs with fixed dose - 750 mg

## Sheet: Table S5
Daily doses (mg) of anti-tuberculosis drugs for the treatment of drug-resistant tuberculosis in Kazakhstan
Drug	Daily dose	30-35 kg	36-45 kg	46-55 kg	56-70 kg	>70 kg
Pyrazinamide	20-30 mg/kg once daily	1000 mg	1500 mg	1500мг	1500 mg	2000 mg
Ethambutol	15–25 mg/kg once daily	800 mg	800 mg	1200 mg	1200 mg	1200мг
Levofloxacin	Less than 30 kg 500 mg once daily	750 mg	750 mg	1000 mg	1000 mg	1000 mg
Moxifloxacin	400 mg once daily in the longer treatment regimen	400 mg	400 mg	400 mg	400 mg	400 mg
	400-800 mg once daily in shortened treatment regimen	400-600 mg	600 mg	600-800 mg	800 mg	800 mg
Amikacin	15–20 mg/kg once daily	500 mg	750 mg	750-1000 mg	1000 mg	1000 mg
Protionamide	15-20 mg/kg	500 mg	500 mg	750 mg	750 mg	1000 mg
Cycloserine	15-20 mg/kg	500 mg	500 mg	750 mg	750 mg	750-1000 mg
Para-amino salicylic acid (hereinafter – PAS)	1500 mg/kg, but not more than 8 g per day in two divided doses	8 g	8 g	8 g	8 g	8–12 g
Bedaquiline	400 mg once daily for 2 weeks, then 200 mg 3 times weekly
Delaminid	100 mg twice a day (daily dose – 200 mg), less than 35 kg – 100 mg daily
Clofaziminum	For the longer treatment regimen, 100 mg daily
	For shortened treatment regimen, with a weight of less than 30 kg – 50 mg, from 30 to 50 kg – 100 mg, more than 50 kg – 100 mg daily
Linezolid	600 mg once daily	600 mg	600 mg	600 mg	600 mg	600 mg
Amoxicillin/clavulanic acid (only when prescribing imipenem)	The daily dose is calculated using clavulanic acid of 125 mg, 30-40 minutes before imipenem injection	250 mg	250 mg	250 mg	250 mg	250 mg
Imipenem/cilastatin	1000 imipinem/1000 mg cilastatin twice a day with an interval of at least 10 hours
Meropenem	1000 mg three times daily (alternative dose of 2000 mg twice a day)
High dose isoniazid (according to weight with shortened treatment regimen)	< 30 kg – 300 mg	450 mg	450 mg	600 mg	600 mg	600 mg
